# Supplementary material for: Pharmacokinetics of Human Recombinant Anti-Botulinum Toxin Antibodies in Rats
Source: PubMed Central journal article supplement (PMC6628388; doi:10.3390/toxins11060345), 2019-06-17
Supplement: toxins-11-00345-s001.pdf [file toxins-11-00345-s001.pdf]

# Supplementary Materials: Pharmacokinetics of Human Recombinant Anti-Botulinum Toxin Antibodies in Rats

Yero Espinoza, David Wong, Ago Ahene, Kenneth Der, Zachary Martinez, John Pham, Ronald R. Cobb, Shauna Farr-Jones, James. D. Marks and Milan T. Tomic

Table S1. Numbers of ADA-positive Animals.

| Dos       | Sex     | Antibody Titer per Time-point (Study Day) |     |     |     |     |     |
|-----------|---------|-------------------------------------------|-----|-----|-----|-----|-----|
|           |         | Pre                                       | 29  | 36  | 43  | 57  | 72  |
| NTM-1631  |         |                                           |     |     |     |     |     |
| 0.1 mg/kg | Males   | 0/3                                       | 0/3 | 0/3 | 0/3 | 1/3 | 0/3 |
|           | Females | 0/3                                       | 0/3 | 0/3 | 0/3 | 0/3 | 0/3 |
|           | Total   | 0/6                                       | 0/6 | 0/6 | 0/6 | 1/6 | 0/6 |
| 1 mg/kg   | Males   | 0/3                                       | 2/3 | 2/3 | 2/3 | 0/3 | 2/3 |
|           | Females | 0/3                                       | 1/3 | 1/3 | 2/3 | 1/3 | 1/3 |
|           | Total   | 0/6                                       | 3/6 | 3/6 | 4/6 | 1/6 | 3/6 |
| 10 mg/kg  | Males   | 0/3                                       | 2/3 | 3/3 | 1/3 | 3/3 | 1/3 |
|           | Females | 0/3                                       | 0/3 | 1/3 | 1/3 | 2/3 | 1/3 |
|           | Total   | 0/6                                       | 2/6 | 4/6 | 2/6 | 5/6 | 2/6 |
| NTM-1632  |         |                                           |     |     |     |     |     |
| Pre       |         |                                           |     |     |     |     |     |
| 0.1 mg/kg | Males   | 0/3                                       | 0/3 | 0/3 | 0/3 | 1/3 | 0/3 |
|           | Females | 0/3                                       | 0/3 | 0/3 | 0/3 | 0/3 | 0/3 |
|           | Total   | 0/6                                       | 0/6 | 0/6 | 0/6 | 1/6 | 0/6 |
| 1 mg/kg   | Males   | 0/3                                       | 2/3 | 2/3 | 2/3 | 0/3 | 2/3 |
|           | Females | 0/3                                       | 1/3 | 1/3 | 2/3 | 1/3 | 1/3 |
|           | Total   | 0/6                                       | 3/6 | 3/6 | 4/6 | 1/6 | 3/6 |
| 10 mg/kg  | Males   | 0/3                                       | 2/3 | 3/3 | 1/3 | 3/3 | 1/3 |
|           | Females | 0/3                                       | 0/3 | 1/3 | 1/3 | 2/3 | 1/3 |
|           | Total   | 0/6                                       | 2/6 | 4/6 | 2/6 | 5/6 | 2/6 |
| NTM-1633  |         |                                           |     |     |     |     |     |
| Pre       |         |                                           |     |     |     |     |     |
| 0.1 mg/kg | Males   | 0/3                                       | 0/3 | 0/3 | 0/3 | 0/3 | 0/3 |
|           | Females | 0/3                                       | 0/3 | 0/3 | 0/3 | 0/3 | 0/3 |
|           | Total   | 0/6                                       | 0/6 | 0/6 | 0/6 | 0/6 | 0/6 |
| 1 mg/kg   | Males   | 0/3                                       | 2/3 | 2/3 | 2/3 | 0/3 | 2/3 |
|           | Females | 0/3                                       | 1/3 | 1/3 | 2/3 | 1/3 | 1/3 |
|           | Total   | 0/6                                       | 3/6 | 3/6 | 4/6 | 1/6 | 3/6 |
| 10 mg/kg  | Males   | 0/3                                       | 2/3 | 3/3 | 1/3 | 3/3 | 1/3 |
|           | Females | 0/3                                       | 0/3 | 1/3 | 1/3 | 2/3 | 1/3 |
|           | Total   | 0/6                                       | 2/6 | 4/6 | 2/6 | 5/6 | 2/6 |
| NTM-1634  |         |                                           |     |     |     |     |     |
| Pre       |         |                                           |     |     |     |     |     |
| 0.1 mg/kg | Males   | 0/3                                       | 0/3 | 0/3 | 0/3 | 1/3 | 0/3 |
|           | Females | 0/3                                       | 0/3 | 0/3 | 0/3 | 0/3 | 0/3 |
|           | Total   | 0/6                                       | 0/6 | 0/6 | 0/6 | 1/6 | 0/6 |
| 1 mg/kg   | Males   | 0/3                                       | 2/3 | 2/3 | 2/3 | 0/3 | 2/3 |
|           | Females | 0/3                                       | 1/3 | 1/3 | 2/3 | 1/3 | 1/3 |
|           | Total   | 0/6                                       | 3/6 | 3/6 | 4/6 | 1/6 | 3/6 |
| 10 mg/kg  | Males   | 0/3                                       | 2/3 | 3/3 | 1/3 | 3/3 | 1/3 |
|           | Females | 0/3                                       | 0/3 | 1/3 | 1/3 | 2/3 | 1/3 |
|           | Total   | 0/6                                       | 2/6 | 4/6 | 2/6 | 5/6 | 2/6 |

<sup>1</sup>With one exception, the serum samples are from different animals at each timepoint. Serum samples taken at pre-doses and on Day 29 are from the same animals.
